# Supplementary material
Source: PubMed Central journal article supplement (PMC2664051)
Supplement: 0812889106_ST2_PDF.pdf [file 0812889106_ST2_PDF.pdf]

Table S2. Antibodies Used in This Study

| Antibody          | Application  | Description            | Source                            |
|-------------------|--------------|------------------------|-----------------------------------|
| Anti-BAF155       | WB           | Rabbit Polyclonal      | (3)                               |
| Anti-BAF170       | WB           | Rabbit Polyclonal      | (3)                               |
| J1 (anti-Brg/Brm) | WB; IP; ChIP | Rabbit Polyclonal      | (4)                               |
| Nanog             | WB; IF       | Rabbit Polyclonal      | Bethyl Laboratories,<br>A300-397A |
| Oct4              | IFC, IF      | Mouse IgG <sub>1</sub> | BD Transduction<br>Clone 40/Oct-3 |
| Oct4              | WB           | Rabbit POLyclonal      | Santa Cruz 9081                   |
| Sox2              | WB, IF       | Rabbit Polyclonal      | Upstate AB5603                    |
